# Supplementary material for: Long-Term Response of Sand Subjected to Repetitive Simple Shear Loading: Shakedown, Ratcheting, and Terminal Void Ratio
Source: Atypon-hosted journal article supplement (doi:10.1061/jggefk.gteng-10814), 2023-03-16
Supplement: supplemental_materials_jggefk.gteng-10814_cha.pdf [file supplemental_materials_jggefk.gteng-10814_cha.pdf]

## SUPPLEMENTAL MATERIALS

*ASCE Journal of Geotechnical and Geoenvironmental Engineering*

# Long-Term Response of Sand Subjected to Repetitive Simple Shear Loading: Shakedown, Ratcheting, and Terminal Void Ratio

Wonjun Cha, Junghee Park, and J. Carlos Santamarina

**DOI:** 10.1061/JGGEFK.GTENG-10814

© ASCE 2023

[www.ascelibrary.org](http://www.ascelibrary.org)

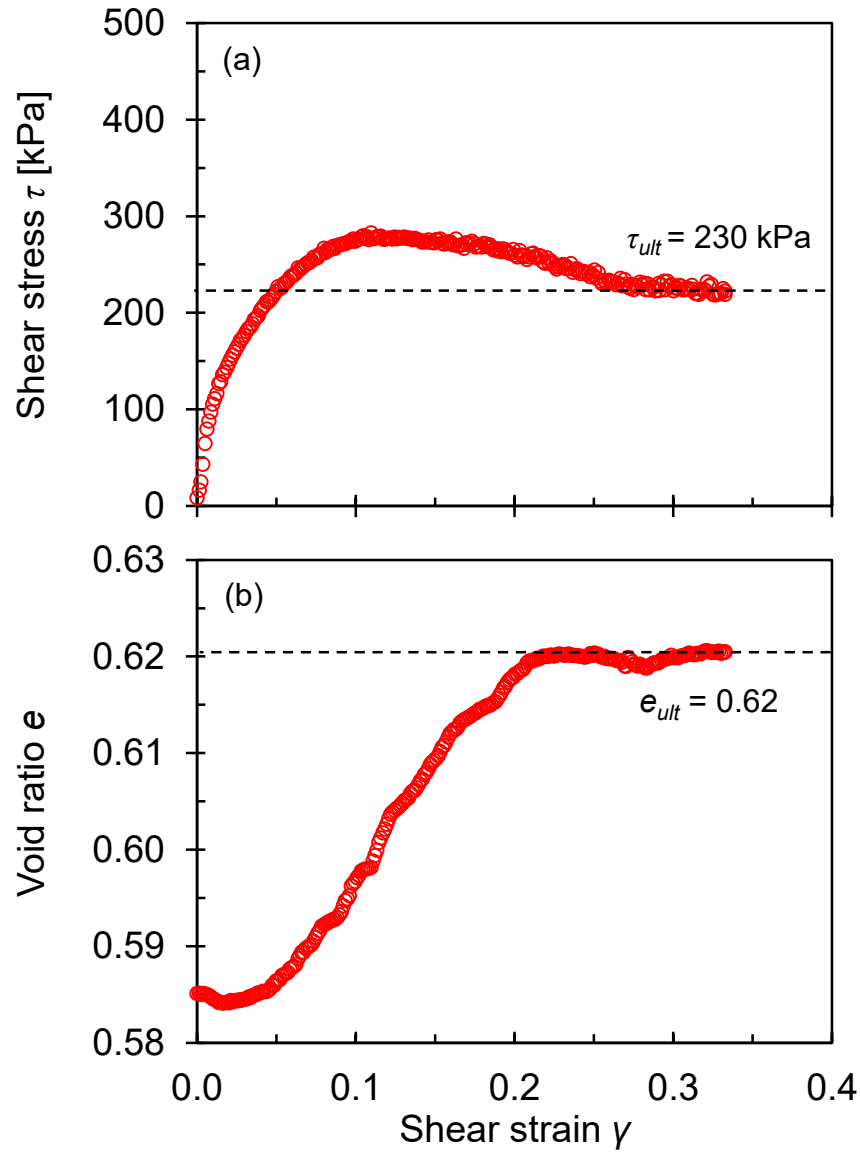

**Figure S1.** Monotonic load-deformation response of dense KAUST 20/30 sand at  $\sigma_v = 500$  kPa. (a) Shear stress  $\tau$  plotted against shear strain  $\gamma$  and (b) Void ratio  $e$  plotted against shear strain  $\gamma$ .

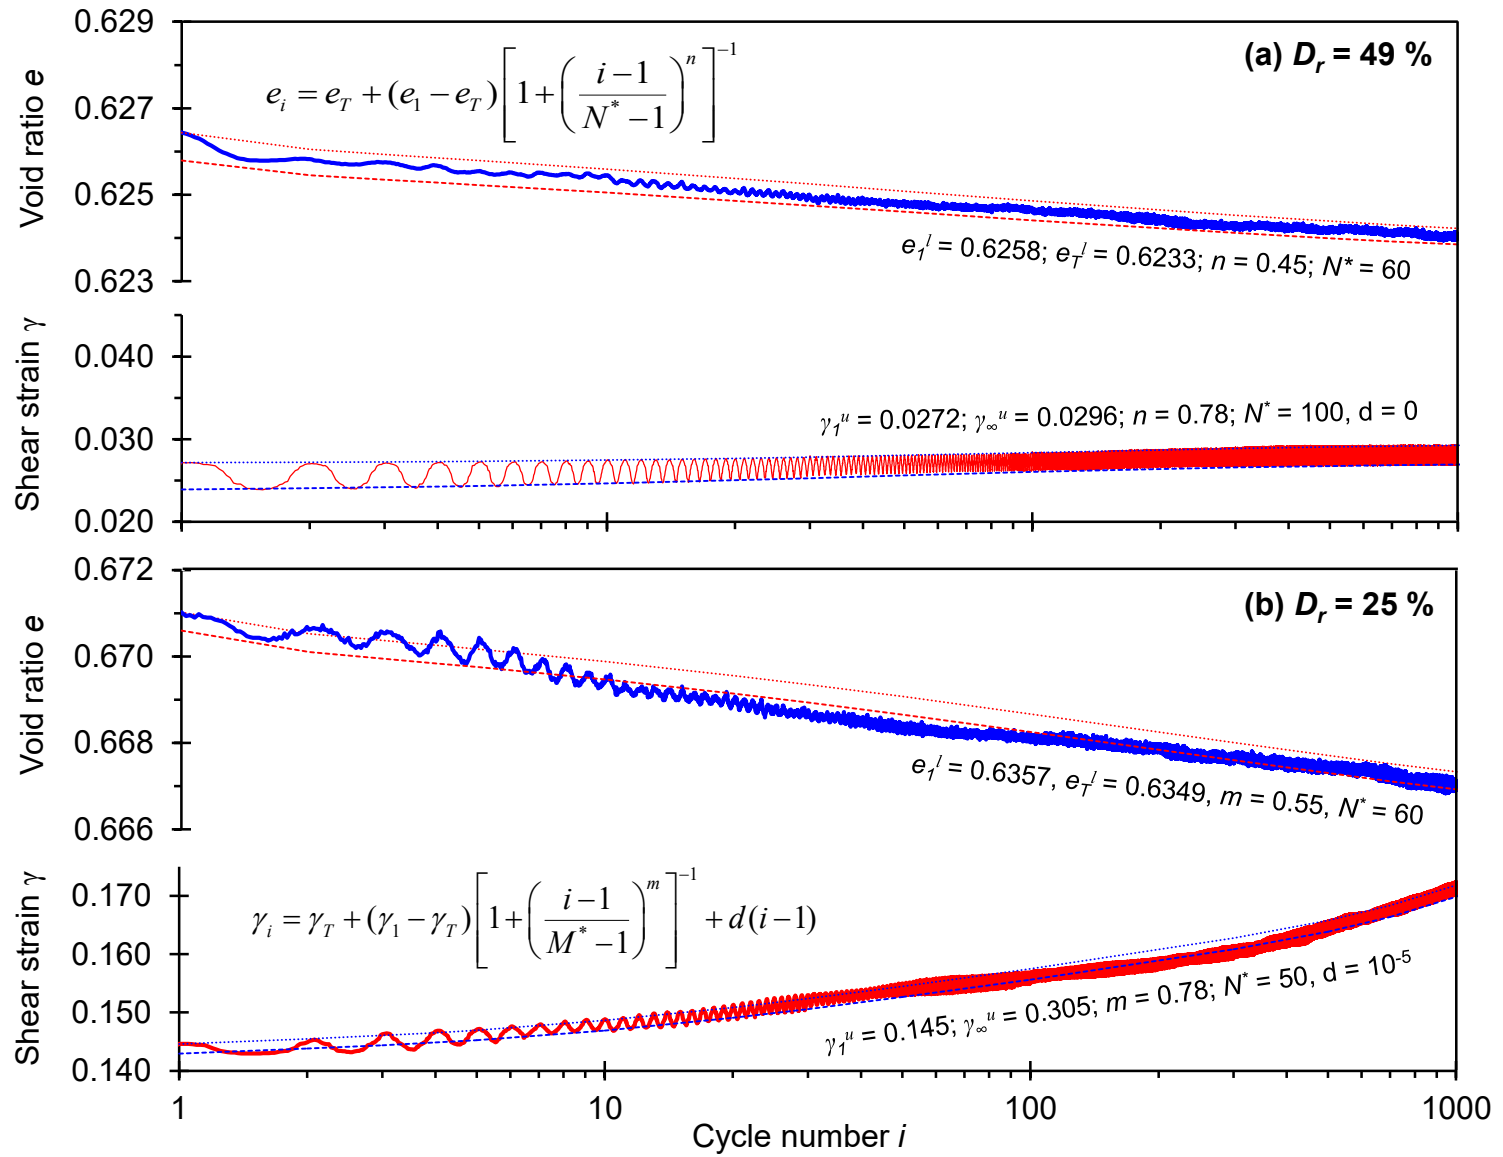

**Figure S2.** Void ratio  $e$  and shear strain  $\gamma$  evolution during repetitive shear loading. The dotted line indicates the fitted upper and lower accumulation trends. (a) Medium dense sand:  $D_r = 49\%$ ,  $\tau_o = 50$  kPa,  $\Delta\tau = 50$  kPa (#2 in Table 1); (b) Loose sand:  $D_r = 25\%$ ,  $\tau_o = 150$  kPa,  $\Delta\tau = 50$  kPa (#4 in Table 1). The accumulation model captures the asymptotic terminal void ratio  $e_T$  and shear strain  $\gamma_T$ .

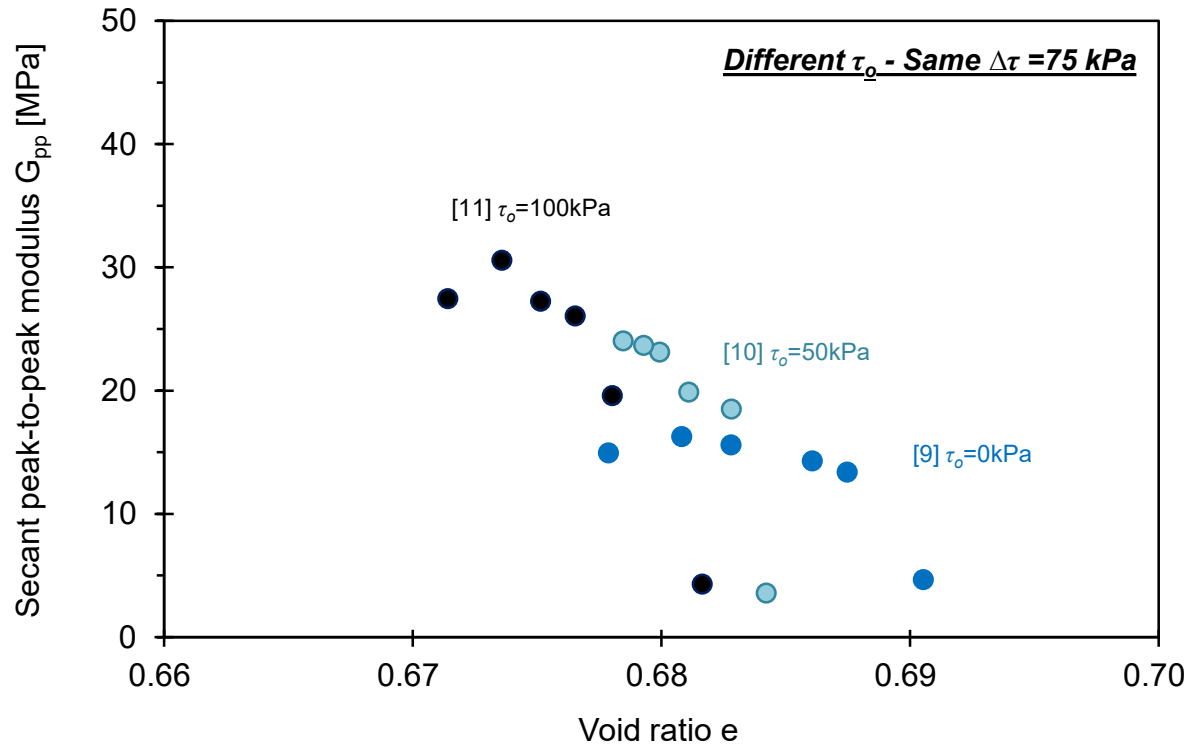

**Figure S3.** Evolution of secant peak-to-peak shear modulus  $G_{pp}$  versus void ratio during repetitive simple shear loading. Initial shear stress  $\tau_o = 0, 50$  and  $100$  kPa, same  $\Delta\tau = 75$  kPa. In square brackets [#]: test number in Table 1. Peak-to-peak strain  $\gamma_{pp} \sim 10^{-3}$  to  $10^{-2}$ .
